# Supplementary material for: Adrenal tropism of SARS-CoV-2 and adrenal findings in a post-mortem case series of patients with severe fatal COVID-19
Source: PubMed Central journal article supplement (PMC8948269; doi:10.1038/s41467-022-29145-3), 2022-03-24
Supplement: 41467_2022_29145_MOESM1_ESM.pdf [file 41467_2022_29145_MOESM1_ESM.pdf]

CACO2 uninfected

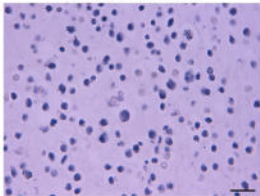

CACO2 infected

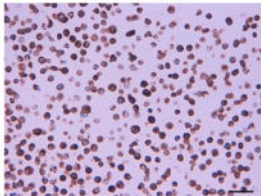

Supplementary Figure 1. Immunohistochemistry of s-SARS-CoV-2 of cell blocks of CACO2 uninfected and infected with SARS-CoV2 (scale bar = 10  $\mu$ m).

## Ribose phosphate

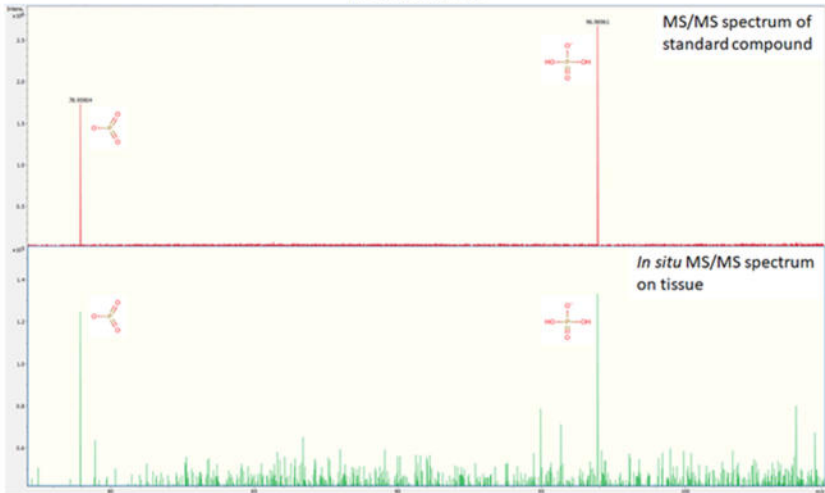

Supplementary Figure 2. Ribose phosphate was identified by in-situ MS/MS experiments comparing the observed MS/MS spectra (green) with standard compounds (red).

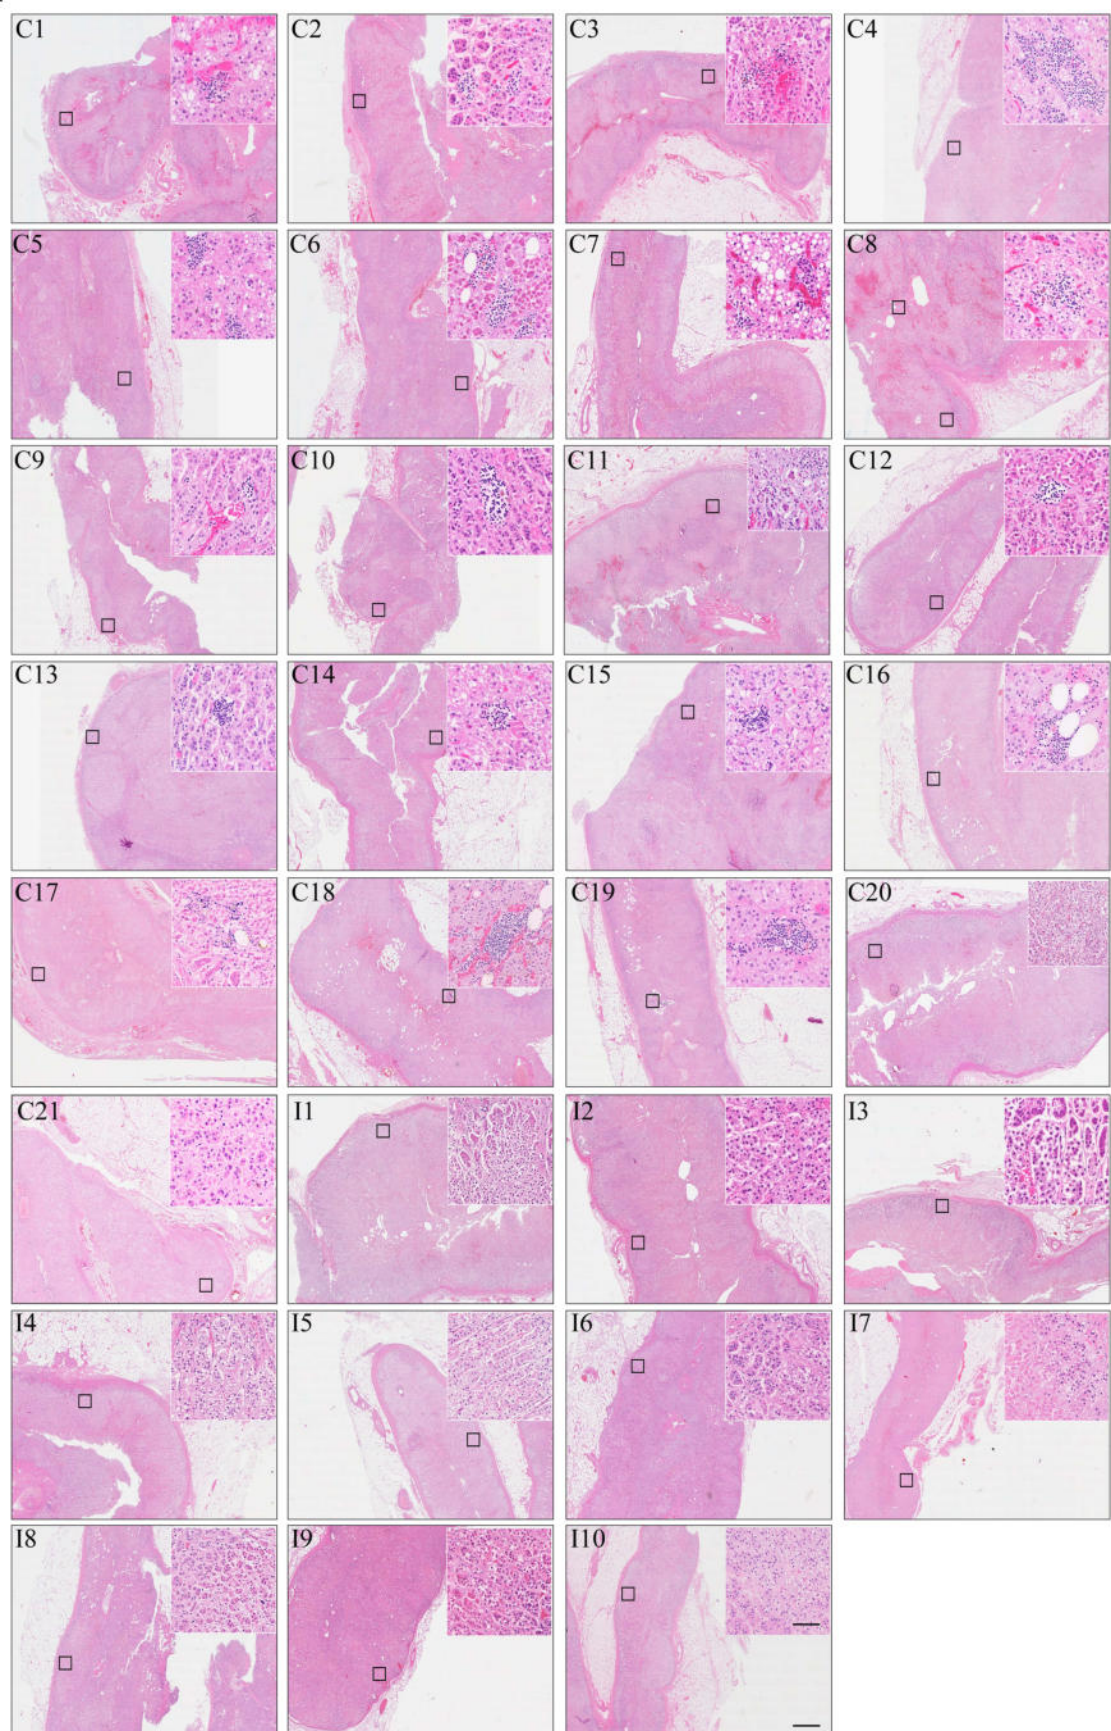

Supplementary Figure 3. H&E images of all adrenal glands (21 COVID-19 patients (C1-21) and 10 influenza patients (I1-10)) are given as an overview (scale bar = 800  $\mu$ m) and magnified inset (scale bar = 50  $\mu$ m).

| Dilution stage | Volume of virus stock ( $\mu\text{l}$ ) | MOI      |
|----------------|-----------------------------------------|----------|
| 1              | 20                                      | 0.05     |
| 2              | 6.67                                    | 0.017    |
| 3              | 2.22                                    | 0.0056   |
| 4              | 0.74                                    | 0.0019   |
| 5              | 0.25                                    | 0.00062  |
| 6              | 0.082                                   | 0.00021  |
| 7              | 0.027                                   | 6.86E-05 |
| 8              | 0.0091                                  | 2.29E-05 |
| 9              | 0.0030                                  | 7.62E-06 |
| 10             | 0.0010                                  | 2.54E-06 |
| 11             | 0.00034                                 | 8.47E-07 |
| 12             | uninfected (0 $\mu\text{l}$ )           | -        |

Supplementary table 1: Multiplicity of infections (MOIs) for the different dilutions of the inoculum used in Figure 2B:

MOI titration of stock: Cells were plated at a density of  $7.5 \times 10^4$  cells per well. The highest volume of virus inoculum of 20  $\mu\text{l}$  corresponds to an MOI of 0.05.
